## Title Page

### **Title: Hnf4a-mediated regulation of proximal tubule progenitors in the mouse kidney**

Sierra S. Marable, Eunah Chung, and Joo-Seop Park

Division of Pediatric Urology and Division of Developmental Biology, Cincinnati  
Children's Hospital Medical Center, Cincinnati, OH 45229, USA  
University of Cincinnati College of Medicine, Cincinnati, OH 45267, USA

Short title: Hnf4a in proximal tubule development

Word count for abstract: 235 words

Word count for text: 3387 words

The authors declare no conflict of interest.

Corresponding author:

Joo-Seop Park

Cincinnati Children's Hospital Medical Center

Location R1566, ML7007

3333 Burnet Avenue

Cincinnati, OH 45229

TEL: 513-803-7871

Email: [joo-seop.park@cchmc.org](mailto:joo-seop.park@cchmc.org)

## ABSTRACT

**Background** Hnf4a is a major regulator of renal proximal tubule (PT) development. In humans, a mutation in *HNF4A* is associated with Fanconi renotubular syndrome (FRTS), which is caused by defective PT functions. In mice, mosaic deletion of *Hnf4a* in the developing kidney causes a paucity of PT cells, leading to FRTS-like symptoms. The molecular mechanisms underlying the role of Hnf4a in PT development remain unclear.

**Methods** We generated a new *Hnf4a* mutant mouse model employing *Osr2Cre*, which effectively deletes *Hnf4a* in developing nephrons. We characterized the mutant phenotype by immunofluorescence analysis. We performed lineage analysis to test if *Cdh6*<sup>+</sup> cells are PT progenitors. We also performed genome-wide mapping of Hnf4a binding sites and differential gene analysis of *Hnf4a* mutant kidneys to identify direct target genes of Hnf4a.

**Results** Deletion of *Hnf4a* with *Osr2Cre* led to complete loss of mature PT cells, causing lethality in the *Hnf4a* mutant mice. We found that *Cdh6*<sup>high</sup>, *LTL*<sup>low</sup> cells serve as PT progenitors and that they show higher proliferation than *Cdh6*<sup>low</sup>, *LTL*<sup>high</sup> differentiated PT cells. We also found that Hnf4a is required for PT progenitors to develop into differentiated PT cells. Our genomic analyses revealed that Hnf4a directly regulates the expression of genes involved in transmembrane transport and metabolism.

**Conclusion** Our findings show that Hnf4a promotes the development of PT progenitors into differentiated PT cells by regulating the expression of genes associated with reabsorption, the major function of PT cells.

## Significance

Proximal tubule cells are the most abundant cell type in the mammalian kidney and they perform the bulk of the renal reabsorption function. Despite their importance in kidney function, the molecular mechanisms of proximal tubule development and maturation are not well understood. Here we find that, in the developing mouse kidney,  $Cdh6^{\text{high}}$ ,  $LTL^{\text{low}}$  cells act as proximal tubule progenitors and that *Hnf4a* is required for these cells to further develop into proximal tubules. Our genomic analyses show that *Hnf4a* directly regulate the expression of genes required for reabsorption such as transmembrane transport genes and metabolism genes. This study advances our understanding of how kidney proximal tubule cells form during development.



## INTRODUCTION

The kidneys function to filter the blood, regulate osmotic levels, maintain electrolyte balance, and metabolize drugs. The functional unit of the kidney is the nephron, which is composed of the glomerulus, the proximal tubule, the loop of Henle, and the distal tubule.<sup>1</sup> Each segment of the nephron has distinct physiological functions and morphology. The proximal tubule cells are the most populous cell type in the kidney and they carry out the bulk of reabsorption in the nephron.<sup>2-4</sup> Under physiological conditions, proximal tubules reabsorb approximately two-thirds of glomerular-filtered water and sodium chloride as well as most of the filtered glucose and phosphate.<sup>5</sup> Proximal tubular reabsorption of water and metabolites is essential in the regulation of body fluid composition and volume. Numerous transporter and metabolism genes are expressed in the proximal tubules in order to facilitate the function and energy demands of these highly active renal epithelial cells.<sup>6-12</sup> Despite their importance in kidney function, the molecular mechanisms of proximal tubule development and maturation are not well understood.

Fanconi renal tubular syndrome (FRTS) is defined as generalized proximal tubule dysfunction.<sup>13, 14</sup> Symptoms of FRTS include glucosuria, phosphaturia, proteinuria, polyuria, and polydipsia.<sup>14, 15</sup> These symptoms are consistent with a failure of the proximal tubules to reabsorb and transport filtered molecules, causing urinary wasting.<sup>16, 17</sup> In humans, the heterozygous mutation R76W in the *HNF4A* gene causes FRTS with nephrocalcinosis.<sup>18</sup> Since this mutation is located in the DNA-binding domain, it has been speculated that the mutation affects the interactions of HNF4A with

regulatory DNA.<sup>18</sup> A recent study of the FRTS *HNF4A* mutation in *Drosophila* nephrocytes confirmed that the mutation reduced binding of Hnf4a to DNA and caused nuclear depletion of Hnf4a in a dominant-negative manner, leading to mitochondrial defects and lipid accumulation.<sup>19</sup>

We have previously shown that *Hnf4a* is expressed in developing proximal tubules in the mouse kidney and that *Hnf4a* is important for proximal tubule formation.<sup>20</sup> Mosaic loss of *Hnf4a* in the murine nephron lineage caused Fanconi renotubular syndrome-like symptoms, including polyuria, polydipsia, glucosuria, and phosphaturia.<sup>20</sup> Due to the mosaic expression of *Six2GFPCre* in mesenchymal nephron progenitor cells, the *Hnf4a* mutant kidney by *Six2GFPCre* was a chimera of wild-type and mutant proximal tubule cells.<sup>20</sup> This made it difficult to perform more rigorous differential gene expression analyses. In this study, we generated a new mouse model with thorough deletion of *Hnf4a* in the proximal segments of the nephron using *Osr2<sup>iresCre</sup>* and investigated the requirement of mature proximal tubules for postnatal survival.<sup>21</sup> We also performed lineage tracing to identify proximal tubule progenitor cells in the developing kidney. To further elucidate the role of *Hnf4a* in proximal tubule development, we performed genome-wide mapping of Hnf4a binding sites in the murine neonate kidney and transcriptomic analysis of the *Hnf4a* mutant kidney. We found that Hnf4a is required for terminal differentiation of proximal tubule cells and that mature proximal tubules are required for postnatal survival. *Cdh6<sup>high</sup>*, *LTL<sup>low</sup>* cells in the developing kidney are proximal tubule progenitor cells and loss of *Hnf4a* causes their developmental arrest. Our genomic analyses revealed that Hnf4a directly regulates

expression of many mature proximal tubule genes, including transport and metabolism genes, consistent with the fact that active reabsorption is the major function of proximal tubules.

## METHODS

### Mice

All mouse alleles used in this study have been previously published: *Osr2*<sup>tm2(cre)Jian</sup>

(*Osr2*<sup>iresCre</sup>);<sup>22</sup> *Hnf4a*<sup>tm1Sad</sup> (*Hnf4a*<sup>c</sup>);<sup>23</sup> *Cdh6*<sup>tm1.1(cre/ERT2)Jrs</sup> (*Cdh6*<sup>CreER</sup>);<sup>24</sup>

*Gt(ROSA)26Sor*<sup>tm3(CAG-EYFP)Hze</sup> (*Rosa26*<sup>Ai3</sup>).<sup>25</sup> All mice were maintained in the Cincinnati Children's Hospital Medical Center (CCHMC) animal facility according to animal care regulations. All experiments were performed in accordance with animal care guidelines and the protocol was approved by the Institutional Animal Care and Use Committee of the Cincinnati Children's Hospital Medical Center (IACUC2017-0037). We adhere to the NIH Guide for the Care and Use of Laboratory Animals.

### Tamoxifen Treatment

Tamoxifen (T5648, Sigma) was dissolved in corn oil (C8267, Sigma) at a concentration of 20mg/ml. Pregnant female mice were injected with tamoxifen intraperitoneally (4mg/40g body weight).

### Immunofluorescence Staining

Embryonic, neonatal, and adult murine kidneys were fixed in 4% paraformaldehyde in phosphate-buffered saline (PBS), incubated overnight in 10% sucrose/PBS at 4°C, and imbedded in OCT (Fisher Scientific). Cryosections (8-9µm) were incubated overnight with primary antibodies in 5% heat-inactivated sheep serum/PBST (PBS with 0.1% Triton X-100). We used primary antibodies for GFP (1:500, Aves GFP-1020), Jag1 (1:20, DSHB TS1.15H), Wt1 (1:100, Santa Cruz sc-7385), Biotin-LTL (1:500, Vector Labs B-1325), FITC-LTL (1:200, Vector Labs FL-1321), Hnf4a (1:500, Abcam ab41898), Hnf4a (1:500, Santa Cruz sc-8987), Lrp2 (1:100, Santa Cruz sc-515772), Ki67 (1:500, BioLegend 652402), and Cdh6 (1:200, Sigma HPA007047). Fluorophore-labeled secondary antibodies were used for indirect visualization of the target. Images were taken with a Nikon Ti-E widefield microscope equipped with an Andor Zyla camera and Lumencor SpectraX light source housed at the Confocal Imaging Core (CIC) at CCHMC.

## **Histology**

Mouse kidneys were harvested and fixed in 4% paraformaldehyde in PBS overnight. Paraffin sections (5 µm) were stained with hematoxylin and eosin or periodic acid-Schiff reagent (American MasterTech KTPAS). Images were taken with a Nikon Ti-E widefield microscope equipped with an Andor Zyla camera and Lumencor SpectraX light source housed at the Confocal Imaging Core (CIC) at CCHMC.

## **ChIP-seq**

ChIP-seq was performed as previously described.<sup>26</sup> Briefly, kidneys from newborn (P0) mice were crosslinked with 1% paraformaldehyde, sonicated, incubated with Hnf4a antibody (Abcam ab41898) coupled Dynabeads Protein G (ThermoFisher). Eluted DNA was used for constructing sequencing libraries using the ThruPLEX DNA-seq kit (Takara). Libraries were sequenced on an Illumina HiSeq 2500 by the DNA Sequencing and Genotyping Core at CCHMC. ChIP-seq reads were mapped to mm9 using Bowtie.<sup>27</sup> We performed peak calling and motif analysis using HOMER.<sup>28</sup> Data are available at Gene Expression Omnibus under accession number GSE144824.

### **RNA-seq**

RNA-seq was performed as previously described.<sup>20</sup> Briefly, 1 µg total RNA was isolated from P0 *Hnf4a* mutant and control kidneys using the RNeasy Plus Micro kit (Qiagen 74034) followed by mRNA isolation with NEBNext Poly(A) mRNA Magnetic Isolation Module (E7490, NEB). Fragmentation of mRNA followed by reverse transcription and second strand cDNA synthesis was done using NEBNext Ultra RNA Library Prep Kit for Illumina (E7530, NEB). Sequencing libraries were constructed using ThruPLEX DNA-seq kit (Takara R400428). Sequencing was performed as described above. RNA-seq reads were mapped to mm9 using TopHat and normalized gene expression values were calculated using Cufflinks.<sup>29</sup> Genes that showed at least a 1.5-fold change in expression with a *p*-value  $\leq 0.05$  were considered differentially expressed. Data are available at Gene Expression Omnibus under accession number GSE144772.

### **Genomic Regions Enrichment of Annotations Tool (GREAT) analysis**

GREAT analysis was performed using the online program, version 3 ([great.stanford.edu](http://great.stanford.edu)).<sup>30</sup> To associate genomic regions with genes, gene regulatory domains were defined as minimum 5.0 kb upstream and 1.0 kb downstream of the TSS, and distally up to 1000 kb to the nearest gene's basal domain ('basal plus extension' option). 10,417 genomic regions from the Hnf4a ChIP-seq dataset were entered into the GREAT online program and Mouse Genome Informatics (MGI) Expression terms of genes associated with the genomic regions were assessed.

### **Gene Ontology Analysis**

Gene ontology analysis was performed using DAVID Bioinformatics Resources ([david.ncifcrf.gov](http://david.ncifcrf.gov)) on differentially expressed genes identified from the RNA-seq analysis.<sup>31</sup>

### **Statistical Analyses**

Statistical analysis of Kaplan-Meier survival curve was performed using GraphPad 8 Prism software. The Log-rank test was used for survival analysis. Student's *t* test was performed using GraphPad 8 Prism software.  $P < 0.05$  was considered to be significant.

## **RESULTS**

### **Hnf4a is required for mature proximal tubule formation**

In our previous study, we utilized *Hnf4a* floxed alleles and *Six2GFPCre* to generate a mouse model with kidney-specific deletion of *Hnf4a*. However, *Six2GFPCre* displayed

mosaic expression in nephron progenitor cells and allowed a subset of nephron progenitors to escape Cre-mediated recombination.<sup>20, 32, 33</sup> Therefore, our previous *Hnf4a* mutant kidney was a chimera of wild-type and mutant cells leading to the FRTS-like phenotype we observed. In order to thoroughly investigate the *Hnf4a* loss-of-function phenotype, we utilized a less mosaic Cre that specifically targets the proximal segments of the nephron. We generated a new mouse model with nephron-specific deletion of *Hnf4a* using a mouse line expressing Cre recombinase under the *Osr2* promoter (*Osr2<sup>iresCre</sup>*)<sup>22</sup> bred with *Hnf4a* floxed mice (*Hnf4a<sup>c/c</sup>*).<sup>23</sup> We have recently shown that *Osr2<sup>iresCre</sup>* is expressed in the proximal and medial segments of the S-shaped body (SSB) of the developing nephron and that the medial segment of SSB develops into proximal tubules and loops of Henle.<sup>21</sup> This Cre, therefore, targets all nephron segments except for the distal tubule. *Osr2<sup>iresCre</sup>* achieved almost complete deletion of *Hnf4a* in the kidney (Figure 1A). *Lotus Tetragonolobus* Lectin (LTL) is known to bind to glycoproteins on the surface of the proximal tubules specifically.<sup>34, 35</sup> Deletion of *Hnf4a* in the nephron led to loss of differentiated proximal tubule cells with high LTL staining (LTL<sup>high</sup>) in postnatal day 0 (P0) kidneys (Figure 1A). The *Hnf4a* mutant kidneys showed a decrease in the level of Lrp2 (Low-density lipoprotein-related protein 2), a proximal tubule-specific endocytic receptor protein also known as Megalin (Figure 1A).<sup>20, 36</sup> A few LTL<sup>low</sup>, Lrp2<sup>low</sup> cells persisted in the *Hnf4a* mutant kidney (Figure 1A, yellow arrowheads). We reasoned that these cells might represent immature proximal tubules or proximal tubule progenitor cells. A distinctive feature of the mature proximal tubules is the apical brush border. The brush border is composed of microvilli which

increase the surface area of the proximal tubule to facilitate reabsorption.<sup>9, 10, 37</sup> The absence of the proximal tubule brush border has been associated with proximal tubule dysfunction in patients, highlighting the importance of brush border formation.<sup>38</sup> We analyzed brush border formation using the Periodic acid-Schiff (PAS) stain<sup>39</sup> and found that *Hnf4a* mutants showed a lack of brush border formation (Figure 1B). Considering that brush border formation only occurs in post-mitotic, differentiated cells<sup>40</sup>, our result suggests that the *Hnf4a* mutant kidney lacks terminally differentiated proximal tubule cells.

### **Loss of *Hnf4a* in the nephron leads to postnatal lethality**

To examine the effects of loss of LTL<sup>high</sup> differentiated proximal tubules on postnatal kidney development, we analyzed the histology of *Hnf4a* mutant kidneys at P0, P7, and P14. At P0, the *Hnf4a* mutant kidney was similar in size to the control (Figure 2A). At P7, the *Hnf4a* mutant kidney was slightly smaller with a thinner cortex than the control kidney (Figure 2B). At P14, the medullary region of the *Hnf4a* mutant kidney was severely damaged, cysts formed in the cortical region, and hydronephrosis was apparent (Figure 2C). Increased filtrate flow through the renal tubules can lead to renal pelvic dilation and nonobstructive hydronephrosis in nephrogenic diabetes insipidus.<sup>41-43</sup> It is likely that hydronephrosis seen in the *Hnf4a* mutant kidney is caused by increased filtrate flow through the nephron tubules due to lack of reabsorption in the proximal tubule. Survival analysis of the *Hnf4a* mutant mice showed that ~60% of *Hnf4a* mutants were deceased by P14, likely due to kidney dysfunction (Figure 2D). No *Hnf4a* mutants



survived to weaning age (P28). These results show that the lack of mature proximal tubules causes postnatal lethality, highlighting the importance of the mature proximal tubule function for survival.

### **Cdh6<sup>high</sup>, LTL<sup>low</sup> cells in the developing kidney are proximal tubule progenitor cells**

It has been previously suggested that Cdh6-expressing cells in the developing murine kidney are presumptive proximal tubule cells.<sup>44</sup> It was reported that, in the mouse embryonic kidney, *Cdh6* was expressed in the medial segment of the SSB and that LTL<sup>+</sup> proximal tubules were still positive for Cdh6 although its expression was downregulated compared to Cdh6<sup>+</sup> cells in the nephrogenic zone. Based on these observations, it was proposed that Cdh6-expressing cells in the nephrogenic zone were destined to become proximal tubules.<sup>44</sup> Consistent with this, we found that there were two distinct populations of Cdh6<sup>+</sup> cells in the wild type developing murine kidney: Cdh6<sup>high</sup> and Cdh6<sup>low</sup> cells (Figure 3A). The majority of Cdh6<sup>high</sup> cells were Hnf4a<sup>+</sup> and had no or low LTL staining (red arrowheads and orange arrowheads, respectively, in Figure 3A), suggesting that these Cdh6<sup>high</sup>, LTL<sup>low</sup> cells are prospective, immature proximal tubule cells. Cdh6<sup>low</sup> cells were also positive for Hnf4a and had strong LTL staining (yellow arrowheads in Figure 3A), suggesting that these Cdh6<sup>low</sup>, LTL<sup>high</sup> cells are differentiated proximal tubule cells. We found that, in the *Hnf4a* mutant kidney, Cdh6<sup>low</sup>, LTL<sup>high</sup> cells were absent and the number of Cdh6<sup>high</sup>, LTL<sup>low</sup> cells were

increased, suggesting that the loss of *Hnf4a* prevents  $Cdh6^{\text{high}}$ ,  $LTL^{\text{low}}$  cells from developing into  $Cdh6^{\text{low}}$ ,  $LTL^{\text{high}}$  cells (Figure 3B).

In order to definitively test if  $Cdh6^{\text{high}}$  cells are proximal tubule progenitor cells, we performed lineage analysis using a tamoxifen-inducible *Cre* recombinase under the *Cdh6* promoter (*Cdh6<sup>CreER</sup>*) and a Cre-inducible *Rosa26<sup>Ai3</sup>* reporter.<sup>24, 25</sup> Pregnant dams were injected with tamoxifen at E14.5 or E16.5 to label  $Cdh6^{\text{high}}$  cells and their descendant cells with the *Rosa26<sup>Ai3</sup>* reporter. Embryos were harvested at E18.5. We found that all *Rosa26<sup>Ai3</sup>* labeled cells were  $Hnf4a^+$  and most were also  $LTL^+$ , indicating that  $Cdh6^{\text{high}}$  cells in the developing kidney are proximal tubule progenitor cells (Figure 4).

*Hnf4a* has been shown to inhibit proliferation in hepatocytes and promote terminal differentiation.<sup>45</sup> Many models of cellular differentiation show an inverse relationship between proliferation and differentiation.<sup>46-49</sup> Terminal differentiation commonly involves exiting the cell cycle and entering a postmitotic state.<sup>46, 50</sup> To determine whether the transition from  $Cdh6^{\text{high}}$ ,  $LTL^{\text{low}}$  proximal tubule progenitors to  $Cdh6^{\text{low}}$ ,  $LTL^{\text{high}}$  differentiated proximal tubule cells coincides with cell cycle exit, we examined Ki67 expression in  $Cdh6^{\text{high}}$  and  $Cdh6^{\text{low}}$  cell populations (Figure 5, A and B). Ki67 is present in actively proliferating cells and absent in resting cells.<sup>51-54</sup> We found that  $Cdh6^{\text{high}}$  proximal tubule progenitor cells were highly proliferative while only few  $Cdh6^{\text{low}}$  cells showed Ki67 expression (Figure 5A). When quantified,  $Cdh6^{\text{high}}$  cells had a 10-fold higher proliferative rate than  $Cdh6^{\text{low}}$  cells, indicating an expansion of the progenitor cell population before they exit the cell cycle and undergo terminal

differentiation into mature proximal tubule cells (Figure 5B). This suggests that the number of proximal tubule cells in the newborn kidney is largely determined by the proliferation of *Cdh6*<sup>high</sup> proximal tubule progenitor cells.

### **Hnf4a gene regulatory network reveals the roles of Hnf4a in regulating proximal tubule development**

To further elucidate the role of Hnf4a in the proximal tubule transcriptional program, we performed chromatin immunoprecipitation followed by high-throughput sequencing (ChIP-seq) with P0 murine kidneys to identify Hnf4a-bound genomic regions. Two Hnf4a ChIP-seq replicates yielded 10,417 reproducible binding sites (peaks) (Supplemental Table 1). Our motif analysis showed high enrichment of the canonical Hnf4a binding DNA sequence within these Hnf4a peaks (Figure 6A), indicating that Hnf4a-bound genomic regions were successfully enriched in our ChIP-seq samples. We also found that DNA motifs for other nuclear receptors including the estrogen-related receptor alpha (ESRRA), the retinoid X receptor (RXR), the peroxisome proliferator-activated receptor (PPAR), and hepatocyte nuclear factor 1 beta (HNF1B) were also enriched within the Hnf4a-bound genomic regions, suggesting that these nuclear receptors share common target genes with Hnf4a to regulate proximal tubule development (Figure 6A). The majority of the Hnf4a peaks were found within 50kb of transcription start sites (TSS) (Figure 6B) and 30% of the peaks were located in promoter regions (Figure 6C). Genomic Regions Enrichment of Annotations Tool (GREAT) analysis of MGI expression annotations of genes associated with Hnf4a

binding sites showed enrichment within the developing renal proximal tubules (Figure 6D),<sup>30</sup> consistent with the fact that *Hnf4a* is specifically expressed in proximal tubules in the kidney. Multiple peaks were identified near the promoters of proximal tubule genes (Supplemental Table 1). In particular, we found Hnf4a peaks near genes such as *Slc34a1* and *Ehhadh*, genes linked to FRTS in human patients (Figure 6E).<sup>55, 56</sup>

We conducted transcriptomic analysis (RNA-seq) of P0 *Hnf4a* mutant kidneys to complement our candidate target gene list with differential gene expression data (Supplemental Table 2). In the *Hnf4a* mutant kidney, 442 genes showed a significant decrease in expression (fold change  $\geq 1.5$ ; p-value  $< 0.05$ ), including *Slc34a1*, *Ehhadh*, and *Ass1*, which are highly expressed in proximal tubules (Figure 7A, Supplemental Table 2).<sup>7, 8</sup> As previously mentioned, mutations in *SLC34A1* and *EHHADH* are associated with FRTS in patients.<sup>55, 56</sup> Gene ontology (GO) analysis of these 442 downregulated genes showed enrichment of genes associated with metabolism and transport (Figure 7B). We found that 196 genes were significantly upregulated in the *Hnf4a* mutant kidneys (fold change  $\geq 1.5$ ; p-value  $< 0.05$ ), including *Cdh6*, the gene marking proximal tubule progenitors (Figure 7A, Supplemental Table 2). GO analysis of the 196 upregulated genes showed enrichment of genes associated with phospholipid homeostasis and cholesterol transport (Figure 7C). In order to determine which genes are directly regulated by Hnf4a, we compared the differentially expressed genes in the *Hnf4a* mutant with the 7,823 genes associated with Hnf4a binding sites to find overlapping genes (Figure 7D, Supplemental Table 3). There were 245 genes in common between the significantly downregulated genes and the Hnf4a binding sites

and 81 common genes between significantly upregulated genes and the Hnf4a binding sites (Figure 7D, Supplemental Table 3). GO analysis of the 245 downregulated genes showed enrichment of genes associated with transport and metabolism (Figure 7E). GO analysis of the 81 upregulated genes showed enrichment of genes associated with transport, metabolism, and response to thyroid hormone and ischemia (Figure 7F). Our genomic and transcriptomic analyses suggest that Hnf4a regulates proximal tubule maturation via activation of transport and metabolism genes, consistent with the functions of the proximal tubule.

## DISCUSSION

In our previous study, we identified two populations of LTL<sup>+</sup> cells in the developing mouse kidney: LTL<sup>low</sup> and LTL<sup>high</sup>. Based on our results, we concluded that these two populations represent presumptive proximal tubules and differentiated proximal tubules, respectively.<sup>20</sup> In order to further examine the presumptive proximal tubule population, we sought to identify a marker of proximal tubule progenitors. Previously, Cdh6 had been proposed as a marker for prospective proximal tubule cells.<sup>44</sup> However, it had not been definitively shown that Cdh6<sup>+</sup> cells develop into proximal tubule cells.<sup>44</sup> To address this, we performed lineage analysis of Cdh6<sup>+</sup> cells in the developing kidney and found that these cells all became Hnf4a<sup>+</sup> proximal tubule cells (Figure 4). This experiment provides strong evidence that Cdh6<sup>+</sup> cells are proximal tubule progenitors in the developing kidney. Cdh6<sup>+</sup> proximal tubule progenitors are highly proliferative, while LTL<sup>high</sup>, Hnf4a<sup>+</sup> proximal tubule cells proliferate less frequently (Figure 5). This suggests

that expansion of proximal tubule progenitors determines the number of proximal tubule cells. Identification of proximal tubule progenitors will allow us to further investigate the developmental mechanisms of proximal tubule development.

We have previously reported that mosaic deletion of *Hnf4a* by *Six2GFPCre* in the developing mouse kidney causes a significant reduction in proximal tubule cells, phenocopying FRTS.<sup>20</sup> The paucity of proximal tubules is consistent with reduced expression of proximal tubule genes, including the genes encoding glucose and phosphate transporters. However, it was unknown which genes were directly regulated by *Hnf4a* in proximal tubules. In this study, we performed *Hnf4a* ChIP-seq on newborn mouse kidneys and RNA-seq analysis of *Hnf4a* mutant kidneys by *Osr2<sup>IresCre</sup>*. From intersection of the ChIP-seq and RNA-seq datasets, we identified 245 *Hnf4a* direct target genes that were downregulated in the *Hnf4a* mutant during kidney development (Figure 7D). Among these 245 targets, the most enriched were genes associated with transmembrane transport, suggesting the role of *Hnf4a* in proximal tubule development correlates with the major function of the proximal tubule, active reabsorption (Figure 7E, Table 1A). The genes associated with fatty acid metabolism were also enriched in these 245 direct target genes (Table 1B). Taking into account that proximal tubule cells are highly active in metabolism and their energy demands are primarily met by fatty acid oxidation<sup>11, 57-59</sup>, our results suggest that *Hnf4a* regulates metabolic reprogramming during proximal tubule development. Interestingly, only 3% of the *Hnf4a* bound genes showed differential expression in the *Hnf4a* mutant kidney. Since many proximal tubule

genes are upregulated postnatally,<sup>60</sup> it is possible that Hnf4a alone is not sufficient to induce expression of the majority of its target genes and co-factors are required.

Motif analysis of genomic regions bound by a given transcription factor provides a list of other transcription factors that physically or genetically interact with the target transcription factor, sharing common target genes. Known motif analysis of our Hnf4a ChIP-seq datasets revealed that the DNA motifs for ESRRA, RXR, PPAR, and Hnf1b were enriched within the Hnf4a-bound genomic regions in the developing mouse kidney. The binding motifs of ESRRA and RXR are quite similar to the Hnf4a binding motif (Figure 6A), which could suggest that there is cooperative binding among these nuclear receptor transcription factors to activate a proximal tubule-specific transcriptional program. In contrast, similar binding motifs could imply competitive binding, since overlapping DNA motifs can lead to competition between transcription factors to activate or repress context-specific transcriptional programs.<sup>61</sup> Recent studies in zebrafish have implicated retinoic acid signaling in the formation of proximal tubules, further supporting RXR as a potential co-regulator of proximal tubule development.<sup>62, 63</sup> Both PPARa/g and Hnf1a/b have been implicated in proximal tubule development and function, indicating that they are good candidate co-regulators of proximal tubule development.<sup>64-66</sup> PPAR transcription factors are known binding partners of RXR and one study predicted 17 common targets between Hnf4a and PPARa.<sup>67</sup> *Hnf1b* is expressed in all nephron segments<sup>68-72</sup> and *Hnf1b* deficiency in the nephron lineage of the mouse kidney leads to defects in nephron formation, particularly the proximal tubules, loops of Henle, and distal tubules.<sup>72, 73</sup> Hnf1b is known to interact with Hnf4a

and regulate common target genes.<sup>67, 69, 74</sup> It has also been shown that expression of *Hnf1b* and *Hnf4a*, along with *Emx2* and *Pax8*, can convert fibroblasts into renal tubular epithelial cells, strongly suggesting that *Hnf1b* is a co-regulator of proximal tubule development.<sup>75</sup> Further investigation is needed to elucidate the interactions among these transcription factors and their roles in proximal tubule development.

In conclusion, we examined the molecular mechanisms of *Hnf4a*-regulated proximal tubule development. We found that proximal tubule development was arrested in the absence of *Hnf4a*. The *Hnf4a* mutant kidney cannot generate mature proximal tubules. Loss of proximal tubule cells in the *Hnf4a* mutant mice caused postnatal lethality, highlighting the importance of functional proximal tubules for survival. In the *Hnf4a* mutant kidney, there is an increase in  $Cdh6^{\text{high}}$ ,  $LTL^{\text{low}}$  presumptive proximal tubule cells. We definitively showed that  $Cdh6^+$  cells in the developing kidney are proximal tubule progenitors. These results suggest that *Hnf4a* is required for proximal tubule progenitors to differentiate into mature proximal tubule cells. Genome-wide analysis of *Hnf4a* binding sites in the kidney and transcriptomic analysis of the *Hnf4a* mutant kidney indicate that *Hnf4a* directly regulates expression of multiple genes involved in transmembrane transport and metabolic processes in the proximal tubule.



## **Author contributions**

S.S.M. performed mouse experiments. S.S.M. and E.C. performed ChIP-seq. E.C. performed RNA-seq. S.S.M. and J.P. designed the experiments, analyzed the data, and cowrote the manuscript. S.S.M made the figures. All authors approved the final version of the manuscript.

## **Acknowledgments**

The authors thank Steve Potter for critically reading the manuscript. We also thank the Confocal Imaging Core (CIC) and the DNA Sequencing and Genotyping Core (DSGC) at CCHMC. This work was supported by the National Institute of Diabetes and Digestive and Kidney Diseases, National Institutes of Health F31 DK120164 to S.S.M. and R01 DK120847 to J.P.

## **Disclosures**

None.

## **Supplemental Material**

Supplemental Table 1. Genome-wide mapping of Hnf4a binding sites in the mouse kidney at P0 (ChIP-seq)

Supplemental Table 2. Differential gene analysis of the Hnf4a mutant kidney at P0 (RNA-seq)

Supplemental Table 3. Intersection of ChIP-seq and RNA-seq

1. McMahon AP: Development of the Mammalian Kidney. *Curr Top Dev Biol* 117: 31-64, 2016
2. Boron WF: Acid-base transport by the renal proximal tubule. *J Am Soc Nephrol* 17(9): 2368-82, 2006
3. Nakamura M, Shirai A, Yamazaki O, Satoh N, Suzuki M, Horita S, Yamada H, Seki G: Roles of renal proximal tubule transport in acid/base balance and blood pressure regulation. *Biomed Res Int* 2014: 504808, 2014
4. Alpern RJ: Cell mechanisms of proximal tubule acidification. *Physiol Rev* 70(1): 79-114, 1990
5. Baum M, Quigley R: Proximal tubule water transport-lessons from aquaporin knockout mice. *Am J Physiol Renal Physiol* 289(6): F1193-4, 2005
6. Takenaka M, Imai E, Kaneko T, Ito T, Moriyama T, Yamauchi A, Hori M, Kawamoto S, Okubo K: Isolation of genes identified in mouse renal proximal tubule by comparing different gene expression profiles. *Kidney Int* 53(3): 562-72, 1998
7. Lee JW, Chou CL, Knepper MA: Deep Sequencing in Microdissected Renal Tubules Identifies Nephron Segment-Specific Transcriptomes. *J Am Soc Nephrol* 26(11): 2669-77, 2015
8. Adam M, Potter AS, Potter SS: Psychrophilic proteases dramatically reduce single-cell RNA-seq artifacts: a molecular atlas of kidney development. *Development* 144(19): 3625-3632, 2017
9. Curthoys NP, Moe OW: Proximal tubule function and response to acidosis. *Clin J Am Soc Nephrol* 9(9): 1627-38, 2014
10. Zhuo JL, Li XC: Proximal nephron. *Compr Physiol* 3(3): 1079-123, 2013
11. Kang HM, Ahn SH, Choi P, Ko YA, Han SH, Chinga F, Park AS, Tao J, Sharma K, Pullman J, Bottinger EP, Goldberg IJ, Susztak K: Defective fatty acid oxidation in renal tubular epithelial cells has a key role in kidney fibrosis development. *Nat Med* 21(1): 37-46, 2015
12. Proctor G, Jiang T, Iwahashi M, Wang Z, Li J, Levi M: Regulation of renal fatty acid and cholesterol metabolism, inflammation, and fibrosis in Akita and OVE26 mice with type 1 diabetes. *Diabetes* 55(9): 2502-9, 2006
13. Walsh SB, Unwin RJ: Renal tubular disorders. *Clin Med (Lond)* 12(5): 476-9, 2012
14. Igarashi T: Pediatric Fanconi Syndrome. In: *Pediatric Nephrology*, edited by Avner ED, Harmon WE, Niaudet P, Yoshikawa N, Emma F, Goldstein SL, Berlin, Heidelberg, Springer Berlin Heidelberg, 2016, pp 1355-1388
15. Klootwijk ED, Reichold M, Unwin RJ, Kleta R, Warth R, Bockenhauer D: Renal Fanconi syndrome: taking a proximal look at the nephron. *Nephrol Dial Transplant* 30(9): 1456-60, 2015

16. Gonick HC: Pathophysiology of human proximal tubular transport defects. *Klin Wochenschr* 60(19): 1201-11, 1982
17. Sirac C, Bridoux F, Essig M, Devuyst O, Touchard G, Cogne M: Toward understanding renal Fanconi syndrome: step by step advances through experimental models. *Contrib Nephrol* 169: 247-61, 2011
18. Hamilton AJ, Bingham C, McDonald TJ, Cook PR, Caswell RC, Weedon MN, Oram RA, Shields BM, Shepherd M, Inward CD, Hamilton-Shield JP, Kohlhase J, Ellard S, Hattersley AT: The HNF4A R76W mutation causes atypical dominant Fanconi syndrome in addition to a beta cell phenotype. *J Med Genet* 51(3): 165-9, 2014
19. Marchesin V, Perez-Marti A, Le Meur G, Pichler R, Grand K, Klootwijk ED, Kesselheim A, Kleta R, Lienkamp S, Simons M: Molecular Basis for Autosomal-Dominant Renal Fanconi Syndrome Caused by HNF4A. *Cell Rep* 29(13): 4407-4421 e5, 2019
20. Marable SS, Chung E, Adam M, Potter SS, Park JS: Hnf4a deletion in the mouse kidney phenocopies Fanconi renotubular syndrome. *JCI Insight* 3(14), 2018
21. Deacon P, Concodora CW, Chung E, Park J-S:  $\beta$ -catenin regulates the formation of multiple nephron segments in the mouse kidney. *Scientific Reports* 9(1): 15915, 2019
22. Lan Y, Wang Q, Ovitt CE, Jiang R: A unique mouse strain expressing Cre recombinase for tissue-specific analysis of gene function in palate and kidney development. *Genesis* 45(10): 618-24, 2007
23. Parviz F, Li J, Kaestner KH, Duncan SA: Generation of a conditionally null allele of hnf4alpha. *Genesis* 32(2): 130-3, 2002
24. Kay JN, De la Huerta I, Kim IJ, Zhang Y, Yamagata M, Chu MW, Meister M, Sanes JR: Retinal ganglion cells with distinct directional preferences differ in molecular identity, structure, and central projections. *J Neurosci* 31(21): 7753-62, 2011
25. Madisen L, Zwingman TA, Sunkin SM, Oh SW, Zariwala HA, Gu H, Ng LL, Palmiter RD, Hawrylycz MJ, Jones AR, Lein ES, Zeng H: A robust and high-throughput Cre reporting and characterization system for the whole mouse brain. *Nat Neurosci* 13(1): 133-40, 2010
26. Park JS, Ma W, O'Brien LL, Chung E, Guo JJ, Cheng JG, Valerius MT, McMahon JA, Wong WH, McMahon AP: Six2 and Wnt regulate self-renewal and commitment of nephron progenitors through shared gene regulatory networks. *Dev Cell* 23(3): 637-51, 2012
27. Langmead B, Trapnell C, Pop M, Salzberg SL: Ultrafast and memory-efficient alignment of short DNA sequences to the human genome. *Genome Biol* 10(3): R25, 2009
28. Heinz S, Benner C, Spann N, Bertolino E, Lin YC, Laslo P, Cheng JX, Murre C, Singh H, Glass CK: Simple combinations of lineage-determining transcription factors prime cis-regulatory elements required for macrophage and B cell identities. *Mol Cell* 38(4): 576-89, 2010

29. Trapnell C, Hendrickson DG, Sauvageau M, Goff L, Rinn JL, Pachter L: Differential analysis of gene regulation at transcript resolution with RNA-seq. *Nat Biotechnol* 31(1): 46-53, 2013
30. McLean CY, Bristor D, Hiller M, Clarke SL, Schaar BT, Lowe CB, Wenger AM, Bejerano G: GREAT improves functional interpretation of cis-regulatory regions. *Nat Biotechnol* 28(5): 495-501, 2010
31. Huang da W, Sherman BT, Lempicki RA: Systematic and integrative analysis of large gene lists using DAVID bioinformatics resources. *Nat Protoc* 4(1): 44-57, 2009
32. Chung E, Deacon P, Marable S, Shin J, Park JS: Notch signaling promotes nephrogenesis by downregulating Six2. *Development* 143(21): 3907-3913, 2016
33. Surendran K, Boyle S, Barak H, Kim M, Stomberski C, McCright B, Kopan R: The contribution of Notch1 to nephron segmentation in the developing kidney is revealed in a sensitized Notch2 background and can be augmented by reducing Mint dosage. *Dev Biol* 337(2): 386-95, 2010
34. Schulte BA, Spicer SS: Histochemical evaluation of mouse and rat kidneys with lectin-horseradish peroxidase conjugates. *Am J Anat* 168(3): 345-62, 1983
35. Hennigar RA, Schulte BA, Spicer SS: Heterogeneous distribution of glycoconjugates in human kidney tubules. *Anat Rec* 211(4): 376-90, 1985
36. Christensen EI, Birn H, Storm T, Weyer K, Nielsen R: Endocytic receptors in the renal proximal tubule. *Physiology (Bethesda)* 27(4): 223-36, 2012
37. Chevalier RL: The proximal tubule is the primary target of injury and progression of kidney disease: role of the glomerulotubular junction. *Am J Physiol Renal Physiol* 311(1): F145-61, 2016
38. Manz F, Waldherr R, Fritz HP, Lutz P, Nutzenadel W, Reitter B, Scharer K, Schmidt H, Trefz F: Idiopathic de Toni-Debre-Fanconi syndrome with absence of proximal tubular brush border. *Clin Nephrol* 22(3): 149-57, 1984
39. Longley JB, Fisher ER: Alkaline phosphatase and the periodic acid Schiff reaction in the proximal tubule of the vertebrate kidney; a study in segmental differentiation. *Anat Rec* 120(1): 1-21, 1954
40. Wessely O, Cerqueira DM, Tran U, Kumar V, Hassey JM, Romaker D: The bigger the better: determining nephron size in kidney. *Pediatr Nephrol* 29(4): 525-30, 2014
41. Zheng K, Xie Y, Li H: Congenital Nephrogenic Diabetes Insipidus Presented With Bilateral Hydronephrosis and Urinary Infection: A Case Report. *Medicine (Baltimore)* 95(22): e3464, 2016
42. Sung CC, Lin SH: Images in clinical medicine. Nonobstructive hydronephrosis with secondary polycythemia. *N Engl J Med* 365(1): e1, 2011
43. Jin XD, Chen ZD, Cai SL, Chen SW: Nephrogenic diabetes insipidus with dilatation of bilateral renal pelvis, ureter and bladder. *Scand J Urol Nephrol* 43(1): 73-5, 2009
44. Cho EA, Patterson LT, Brookhiser WT, Mah S, Kintner C, Dressler GR: Differential expression and function of cadherin-6 during renal epithelium development. *Development* 125(5): 803-12, 1998

45. Walesky C, Apte U: Role of hepatocyte nuclear factor 4alpha (HNF4alpha) in cell proliferation and cancer. *Gene Expr* 16(3): 101-8, 2015
46. Ruijtenberg S, van den Heuvel S: Coordinating cell proliferation and differentiation: Antagonism between cell cycle regulators and cell type-specific gene expression. *Cell Cycle* 15(2): 196-212, 2016
47. Sachs L: Constitutive uncoupling of the controls for growth and differentiation in myeloid leukemia and the development of cancer. *J Natl Cancer Inst* 65(4): 675-9, 1980
48. Maione R, Amati P: Interdependence between muscle differentiation and cell-cycle control. *Biochim Biophys Acta* 1332(1): M19-30, 1997
49. Walsh K, Perlman H: Cell cycle exit upon myogenic differentiation. *Curr Opin Genet Dev* 7(5): 597-602, 1997
50. Marx J: Cell biology. Cell cycle inhibitors may help brake growth as cells develop. *Science* 267(5200): 963-4, 1995
51. Gerdes J, Schwab U, Lemke H, Stein H: Production of a mouse monoclonal antibody reactive with a human nuclear antigen associated with cell proliferation. *Int J Cancer* 31(1): 13-20, 1983
52. Gerdes J, Lemke H, Baisch H, Wacker HH, Schwab U, Stein H: Cell cycle analysis of a cell proliferation-associated human nuclear antigen defined by the monoclonal antibody Ki-67. *J Immunol* 133(4): 1710-5, 1984
53. Alison MR: Assessing cellular proliferation: what's worth measuring? *Hum Exp Toxicol* 14(12): 935-44, 1995
54. Scholzen T, Gerdes J: The Ki-67 protein: from the known and the unknown. *J Cell Physiol* 182(3): 311-22, 2000
55. Magen D, Berger L, Coady MJ, Ilivitzki A, Militianu D, Tieder M, Selig S, Lapointe JY, Zelikovic I, Skorecki K: A loss-of-function mutation in NaPi-IIa and renal Fanconi's syndrome. *N Engl J Med* 362(12): 1102-9, 2010
56. Klootwijk ED, Reichold M, Helip-Wooley A, Tolaymat A, Broecker C, Robinette SL, Reinders J, Peindl D, Renner K, Eberhart K, Assmann N, Oefner PJ, Dettmer K, Sterner C, Schroeder J, Zorger N, Witzgall R, Reinhold SW, Stanescu HC, Bockenbauer D, Jaureguiberry G, Courtneidge H, Hall AM, Wijeyesekera AD, Holmes E, Nicholson JK, O'Brien K, Bernardini I, Krasnewich DM, Arcos-Burgos M, Izumi Y, Nonoguchi H, Jia Y, Reddy JK, Ilyas M, Unwin RJ, Gahl WA, Warth R, Kleta R: Mistargeting of peroxisomal EHHADH and inherited renal Fanconi's syndrome. *N Engl J Med* 370(2): 129-38, 2014
57. Balaban RS, Mandel LJ: Metabolic substrate utilization by rabbit proximal tubule. An NADH fluorescence study. *Am J Physiol* 254(3 Pt 2): F407-16, 1988
58. Elhamri M, Martin M, Ferrier B, Baverel G: Substrate uptake and utilization by the kidney of fed and starved rats in vivo. *Ren Physiol Biochem* 16(6): 311-24, 1993
59. Weidemann MJ, Krebs HA: The fuel of respiration of rat kidney cortex. *Biochem J* 112(2): 149-66, 1969
60. Brunskill EW, Park JS, Chung E, Chen F, Magella B, Potter SS: Single cell dissection of early kidney development: multilineage priming. *Development* 141(15): 3093-101, 2014

61. Hermsen R, Tans S, ten Wolde PR: Transcriptional regulation by competing transcription factor modules. *PLoS Comput Biol* 2(12): e164, 2006
62. Wingert RA, Selleck R, Yu J, Song HD, Chen Z, Song A, Zhou Y, Thisse B, Thisse C, McMahon AP, Davidson AJ: The cdx genes and retinoic acid control the positioning and segmentation of the zebrafish pronephros. *PLoS Genet* 3(10): 1922-38, 2007
63. Li Y, Cheng CN, Verdun VA, Wingert RA: Zebrafish nephrogenesis is regulated by interactions between retinoic acid, mecom, and Notch signaling. *Dev Biol* 386(1): 111-22, 2014
64. Casemayou A, Fournel A, Bagattin A, Schanstra J, Belliere J, Decramer S, Marsal D, Gillet M, Chassaing N, Huart A, Pontoglio M, Knauf C, Bascands JL, Chauveau D, Faguer S: Hepatocyte Nuclear Factor-1beta Controls Mitochondrial Respiration in Renal Tubular Cells. *J Am Soc Nephrol* 28(11): 3205-3217, 2017
65. Ferre S, Igarashi P: New insights into the role of HNF-1beta in kidney (patho)physiology. *Pediatr Nephrol* 34(8): 1325-1335, 2019
66. Izzedine H, Launay-Vacher V, Baumelou A, Deray G: Renal effects of PPARalpha-agonists. *Minerva Urol Nefrol* 56(4): 339-42, 2004
67. Martovetsky G, Tee JB, Nigam SK: Hepatocyte nuclear factors 4alpha and 1alpha regulate kidney developmental expression of drug-metabolizing enzymes and drug transporters. *Mol Pharmacol* 84(6): 808-23, 2013
68. Lazzaro D, De Simone V, De Magistris L, Lehtonen E, Cortese R: LFB1 and LFB3 homeoproteins are sequentially expressed during kidney development. *Development* 114(2): 469-79, 1992
69. Lau HH, Ng NHJ, Loo LSW, Jasmen JB, Teo AKK: The molecular functions of hepatocyte nuclear factors - In and beyond the liver. *J Hepatol* 68(5): 1033-1048, 2018
70. Pontoglio M, Barra J, Hadchouel M, Doyen A, Kress C, Bach JP, Babinet C, Yaniv M: Hepatocyte nuclear factor 1 inactivation results in hepatic dysfunction, phenylketonuria, and renal Fanconi syndrome. *Cell* 84(4): 575-85, 1996
71. Pontoglio M, Prie D, Cheret C, Doyen A, Leroy C, Froguel P, Velho G, Yaniv M, Friedlander G: HNF1alpha controls renal glucose reabsorption in mouse and man. *EMBO Rep* 1(4): 359-65, 2000
72. Heliot C, Desgrange A, Buisson I, Prunskaitė-Hyyryläinen R, Shan J, Vainio S, Umbhauer M, Cereghini S: HNF1B controls proximal-intermediate nephron segment identity in vertebrates by regulating Notch signalling components and *Irx1/2*. *Development* 140(4): 873-85, 2013
73. Massa F, Garbay S, Bouvier R, Sugitani Y, Noda T, Gubler MC, Heidet L, Pontoglio M, Fischer E: Hepatocyte nuclear factor 1beta controls nephron tubular development. *Development* 140(4): 886-96, 2013
74. Hatzis P, Talianidis I: Regulatory mechanisms controlling human hepatocyte nuclear factor 4alpha gene expression. *Mol Cell Biol* 21(21): 7320-30, 2001
75. Kaminski MM, Tosic J, Kresbach C, Engel H, Klockenbusch J, Muller AL, Pichler R, Grahammer F, Kretz O, Huber TB, Walz G, Arnold SJ, Lienkamp SS: Direct

reprogramming of fibroblasts into renal tubular epithelial cells by defined transcription factors. *Nat Cell Biol* 18(12): 1269-1280, 2016



## FIGURE LEGENDS

### **Figure 1. *Hnf4a* deletion by *Osr2Cre* leads to loss of mature proximal tubule (PT)**

**cells.** (A) Loss of *Hnf4a* in the nephron inhibits formation of LTL<sup>high</sup>, mature PT cells and causes a decrease in expression of *Lrp2*, a PT-specific gene in the newborn (P0) kidney. Yellow arrowheads mark LTL<sup>low</sup>, *Lrp2*<sup>low</sup> cells that persist in the mutant. Image is representative of  $n=3$ . Scale bar, 100 $\mu$ m. (B) Periodic acid-Schiff (PAS) staining of control and *Hnf4a* mutant kidneys at P0 show *Hnf4a* mutants lack brush border. Black arrowheads mark brush border. Image is representative of  $n=3$ . Scale bar, 50 $\mu$ m.

### **Figure 2. Loss of mature proximal tubules leads to postnatal lethality in *Hnf4a***

**mutant mice.** (A-C) Hematoxylin and eosin (H&E) staining of *Hnf4a* mutant kidneys at birth (P0), postnatal day 7 (P7), and postnatal day 14 (P14). Images are representative of  $n=4$ . Scale bar, 100 $\mu$ m. (D) Kaplan-Meier survival analysis of the *Hnf4a* mutants with heterozygous controls. \*P-value < 0.0001, determined by Log-rank test.

### **Figure 3. High *Cdh6* expression is persistent in the *Hnf4a* mutant kidney.**

(A) In the P0 control kidney, *Cdh6* expression is high in LTL<sup>neg</sup> and LTL<sup>low</sup>, presumptive PT cells (red and orange arrowheads, respectively) and *Cdh6* expression decreases as PT cells develop into LTL<sup>high</sup>, mature PT cells (yellow arrowheads). In the *Hnf4a* mutant kidney, *Cdh6*<sup>high</sup>, LTL<sup>low</sup> cells are more abundant compared to the control and there are no *Cdh6*<sup>low</sup>, LTL<sup>high</sup> cells to be found. Scale bar, 100 $\mu$ m. Image is representative of  $n=3$ . (B) Quantification of *Cdh6*<sup>high</sup> and *Cdh6*<sup>low</sup> cells in the *Hnf4a* mutant and control kidney. \*P-value < 0.01, determined by *t* test.



**Figure 4. Cdh6 lineage tracing shows that Cdh6<sup>+</sup> cells are PT progenitor cells.**

Lineage labeling of Cdh6<sup>+</sup> cells with Ai3 after tamoxifen injection into pregnant dams at E14.5 or E16.5. All Ai3<sup>+</sup> cells are Hnf4a<sup>+</sup> and most are also LTL<sup>+</sup> (yellow arrowheads) at E18.5. Images are representative of  $n=3$ . Scale bar, 100 $\mu$ m.

**Figure 5. Cdh6<sup>high</sup> PT progenitor cells have a higher proliferation rate than Cdh6<sup>low</sup> mature PT cells.**

(A) Representative immunostains for Ki67, Cdh6, and Hnf4a in the P0 kidney ( $n=4$ ). Cdh6<sup>high</sup> (orange arrowheads); Cdh6<sup>low</sup> (yellow arrowheads). Scale bar, 50 $\mu$ m. (B) Quantification of Ki67 positive cells per 500 $\mu$ m<sup>2</sup> field. \*P-value < 0.01, determined by *t* test.

**Figure 6. Genome-wide mapping of Hnf4a binding sites in the newborn mouse kidney**

(A) Analysis of known motifs from Hnf4a ChIP-seq. (B) Bar graph showing the percentage of region–gene associations according to genomic regions' distance to TSS computed by Genomic Regions Enrichment of Annotations Tool (GREAT) (<http://bejerano.stanford.edu/great/public/html/>). (C) Pie chart representing the distribution of Hnf4a peaks within the annotated genome. (D) GREAT MGI Expression annotations of Hnf4a peaks showing top six enriched terms. (E) Genome browser view of Hnf4a ChIP-seq peaks near TSS of PT genes.

**Figure 7. Intersection of Hnf4a ChIP-seq peaks with differentially expressed genes in the *Hnf4a* mutant kidney identified direct target genes of Hnf4a. (A)**

Differential expression analysis in the *Hnf4a* mutant versus the *Hnf4a* control kidney at P0. Red and blue points in the volcano plot mark genes with significantly decreased or increased expression, respectively, in the *Hnf4a* mutant. Vertical dash lines (x-axis)

mark  $\log_2(1.5)$ . Horizontal dash line (y-axis) marks  $-\log_{10}(0.05)$  (B) Gene ontology (GO)

analysis of significantly downregulated genes in the *Hnf4a* mutant kidney showing top

six enriched terms. (C) GO analysis of significantly upregulated genes in the *Hnf4a*

mutant kidney showing top six enriched terms. (D) Venn diagram shows the overlap of

genes associated with Hnf4a binding sites and differentially expressed genes in the

Hnf4a mutant kidney. (E) GO analysis of Hnf4a-bound, downregulated genes showing

top six enriched terms. (F) GO analysis of Hnf4a-bound, upregulated genes showing top

six enriched terms.

**Table 1. Hnf4a target genes that were downregulated in the *Hnf4a* mutant kidney**

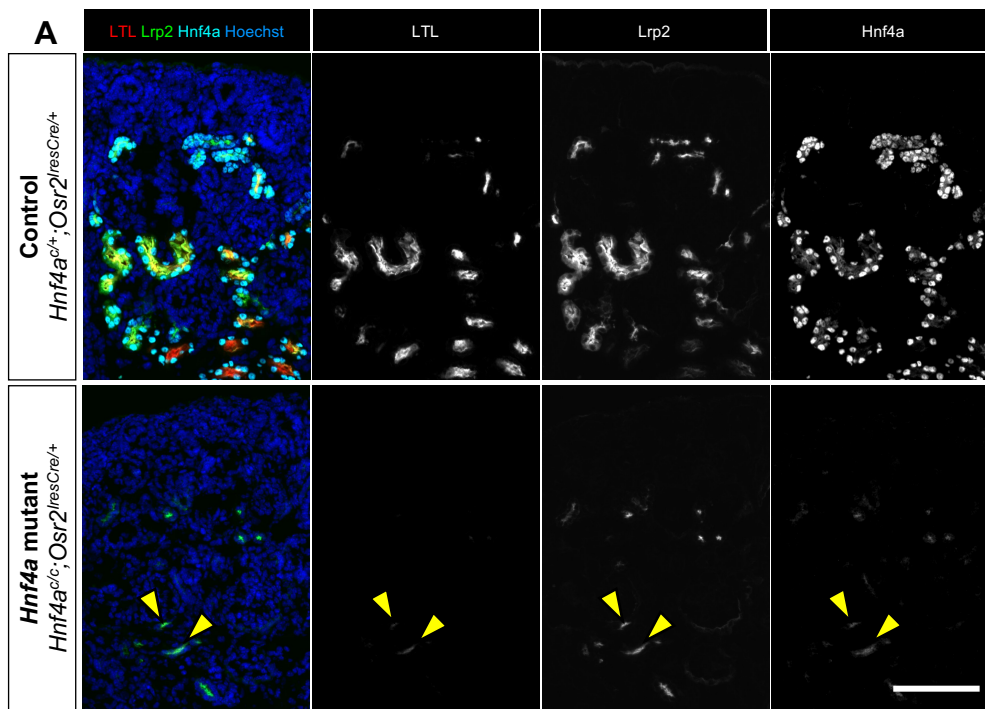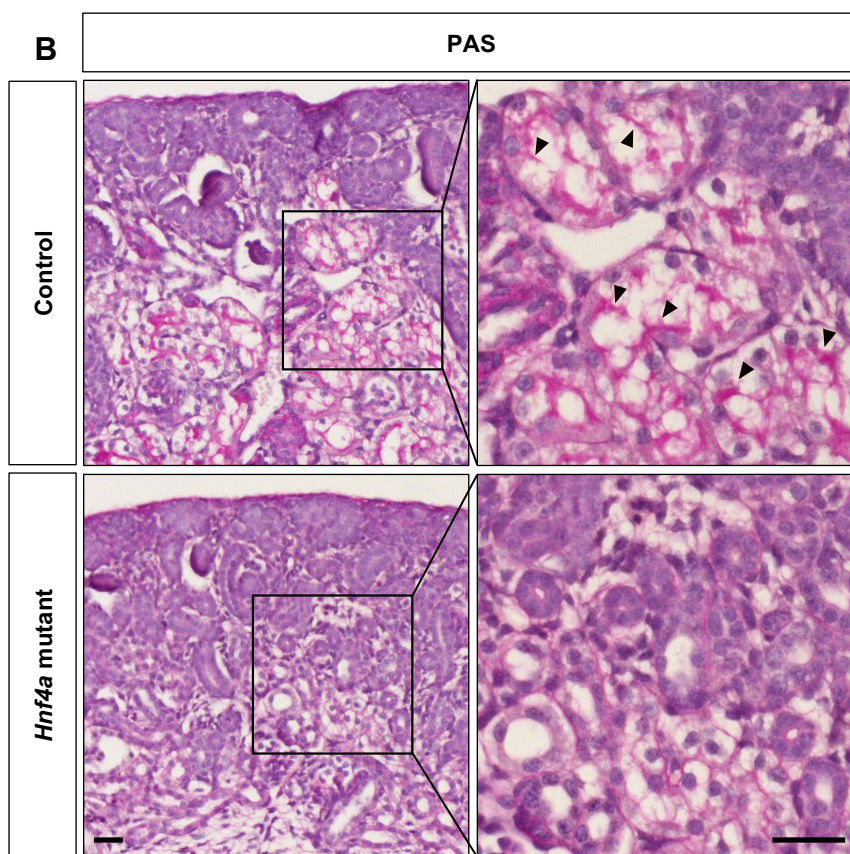

**Figure 1. *Hnf4a* deletion by *Osr2Cre* leads to loss of mature proximal tubule (PT) cells.** (A) Loss of *Hnf4a* in the nephron inhibits formation of LTL<sup>high</sup>, mature PT cells and causes a decrease in expression of *Lrp2*, a PT-specific gene in the newborn (P0) kidney. Yellow arrowheads mark LTL<sup>low</sup>, Lrp2<sup>low</sup> cells that persist in the mutant. Image is representative of *n*=3. Scale bar, 100 $\mu$ m. (B) Periodic acid-Schiff (PAS) staining of control and *Hnf4a* mutant kidneys at P0 show *Hnf4a* mutants lack brush border. Black arrowheads mark brush border. Image is representative of *n*=3. Scale bar, 50 $\mu$ m.

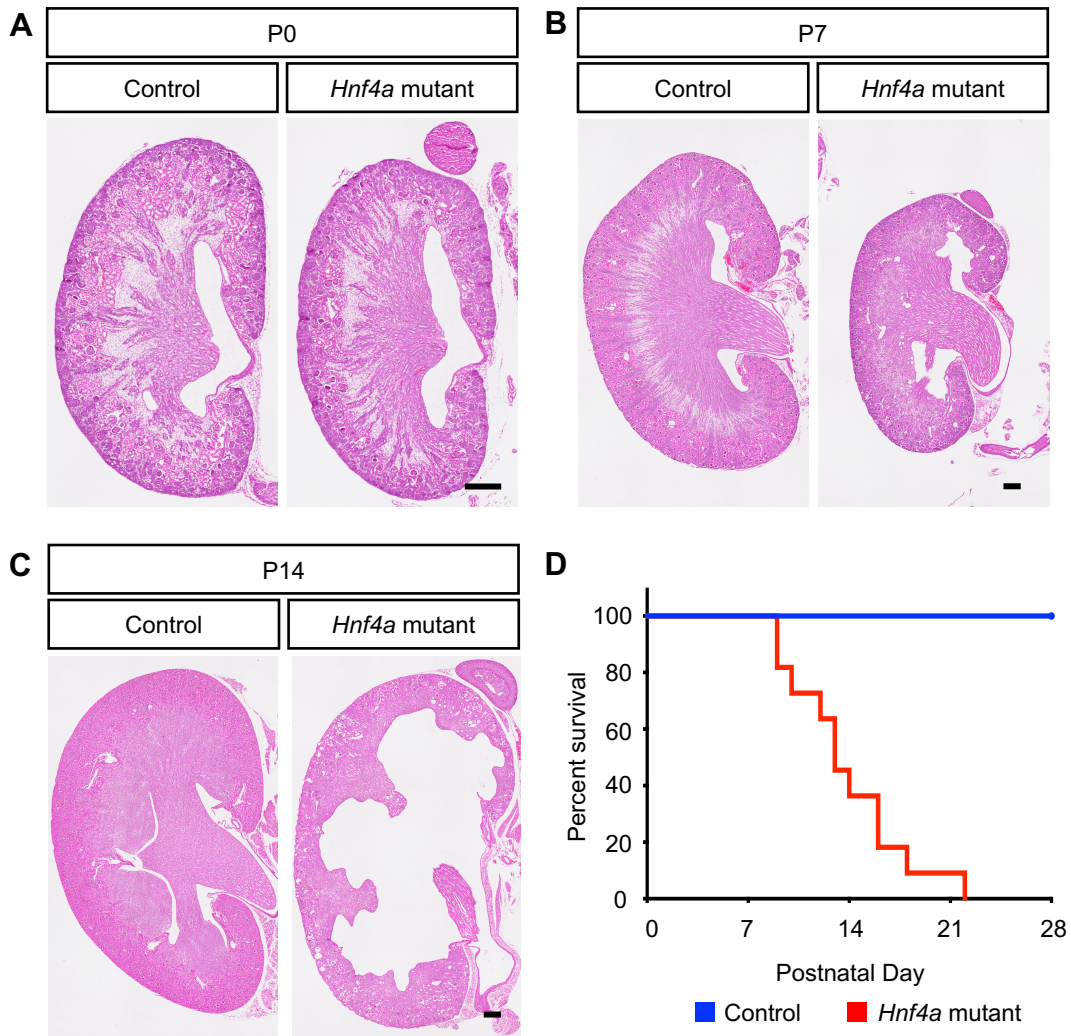

**Figure 2. Loss of mature proximal tubules leads to postnatal lethality in *Hnf4a* mutant mice.** (A-C) Hematoxylin and eosin (H&E) staining of *Hnf4a* mutant kidneys at birth (P0), postnatal day 7 (P7), and postnatal day 14 (P14). Images are representative of  $n=4$ . Scale bar, 100 $\mu$ m. (D) Kaplan-Meier survival analysis of the *Hnf4a* mutants with heterozygous controls. \*P-value < 0.0001, determined by Log-rank test.

**Figure 3. High Cdh6 expression is persistent in the *Hnf4a* mutant kidney.** (A) In the P0 control kidney, Cdh6 expression is high in LTL<sup>neg</sup> and LTL<sup>low</sup>, presumptive PT cells (red and orange arrowheads, respectively) and Cdh6 expression decreases as PT cells develop into LTL<sup>high</sup>, mature PT cells (yellow arrowheads). In the *Hnf4a* mutant kidney, Cdh6<sup>high</sup>,LTL<sup>low</sup> cells are more abundant compared to the control and there are no Cdh6<sup>low</sup>, LTL<sup>high</sup> cells to be found. Scale bar, 100µm. Image is representative of n=3. (B) Quantification of Cdh6<sup>high</sup> and Cdh6<sup>low</sup> cells in the *Hnf4a* mutant and control kidney. \*P-value < 0.01, determined by *t* test.

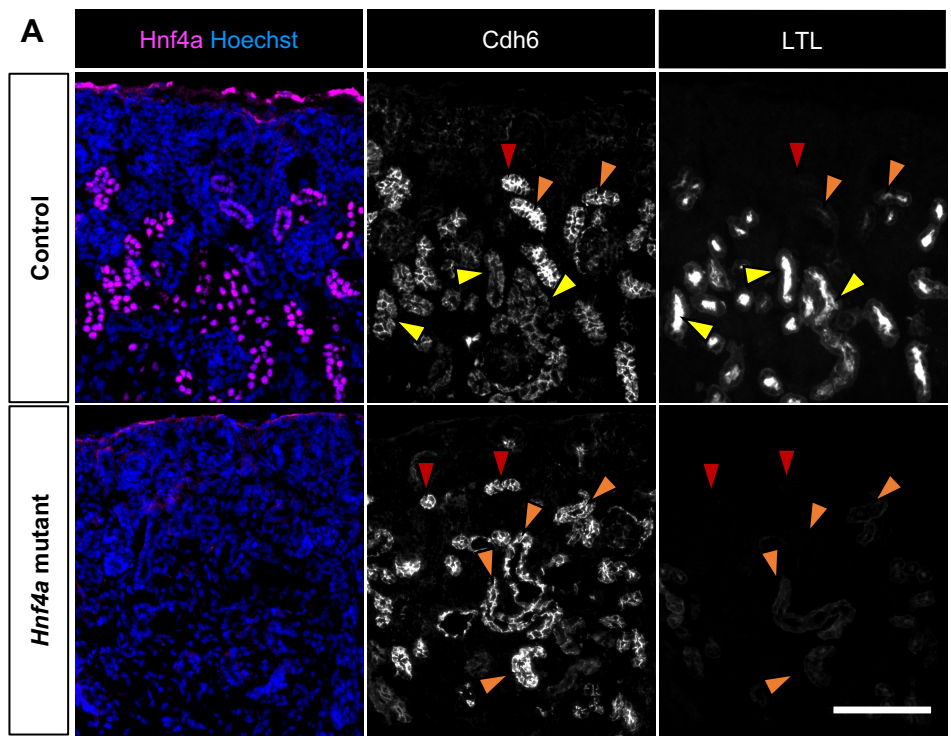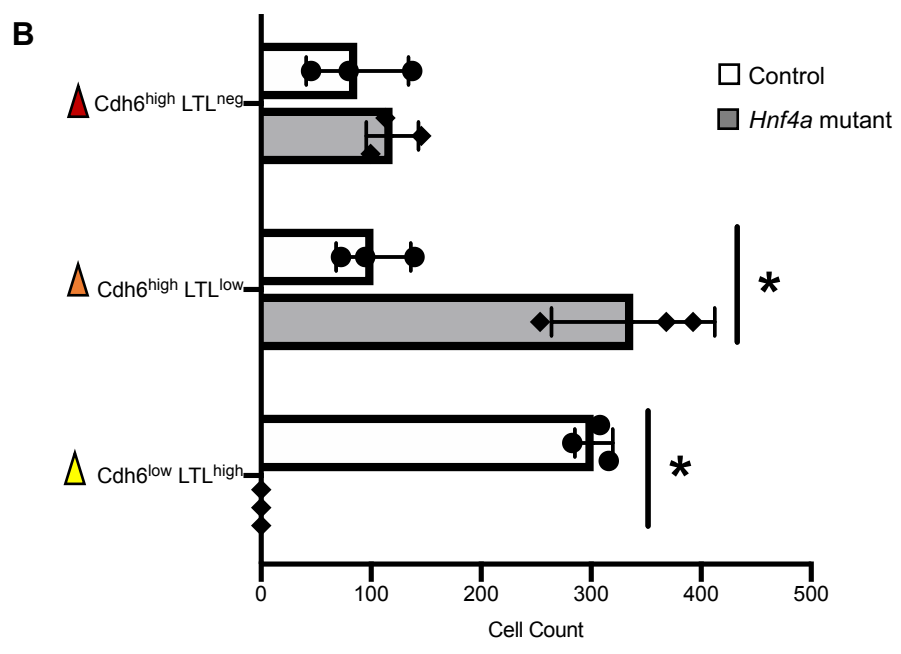



**Figure 4. Cdh6 lineage tracing shows that Cdh6<sup>+</sup> cells are PT progenitor cells.** Lineage labeling of Cdh6<sup>+</sup> cells with Ai3 after tamoxifen injection into pregnant dams at E14.5 or E16.5. All Ai3<sup>+</sup> cells are Hnf4a<sup>+</sup> and most are also LTL<sup>+</sup> (yellow arrowheads) at E18.5. Images are representative of *n*=3. Scale bar, 100μm.

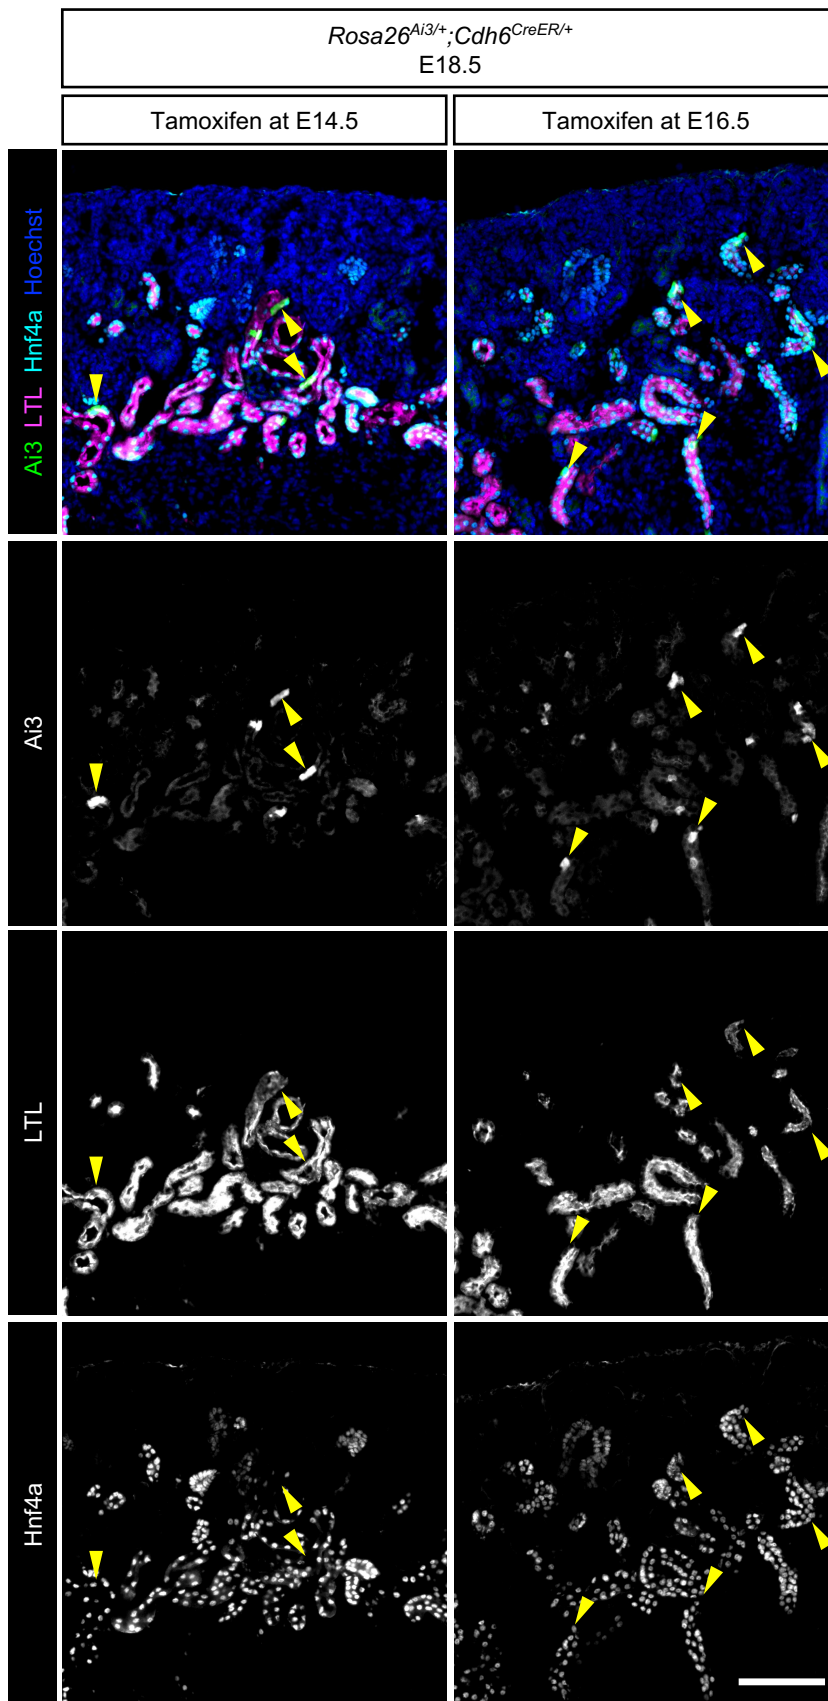

**Figure 5. Cdh6<sup>high</sup> PT progenitor cells have a higher proliferation rate than Cdh6<sup>low</sup> mature PT cells.** (A) Representative immunostains for Ki67, Cdh6, and Hnf4a in the P0 kidney ( $n=4$ ). Cdh6<sup>high</sup> (orange arrowheads); Cdh6<sup>low</sup> (yellow arrowheads). Scale bar, 50 $\mu$ m. (B) Quantification of Ki67 positive cells per 500 $\mu$ m<sup>2</sup> field. \*P-value < 0.01, determined by *t* test.

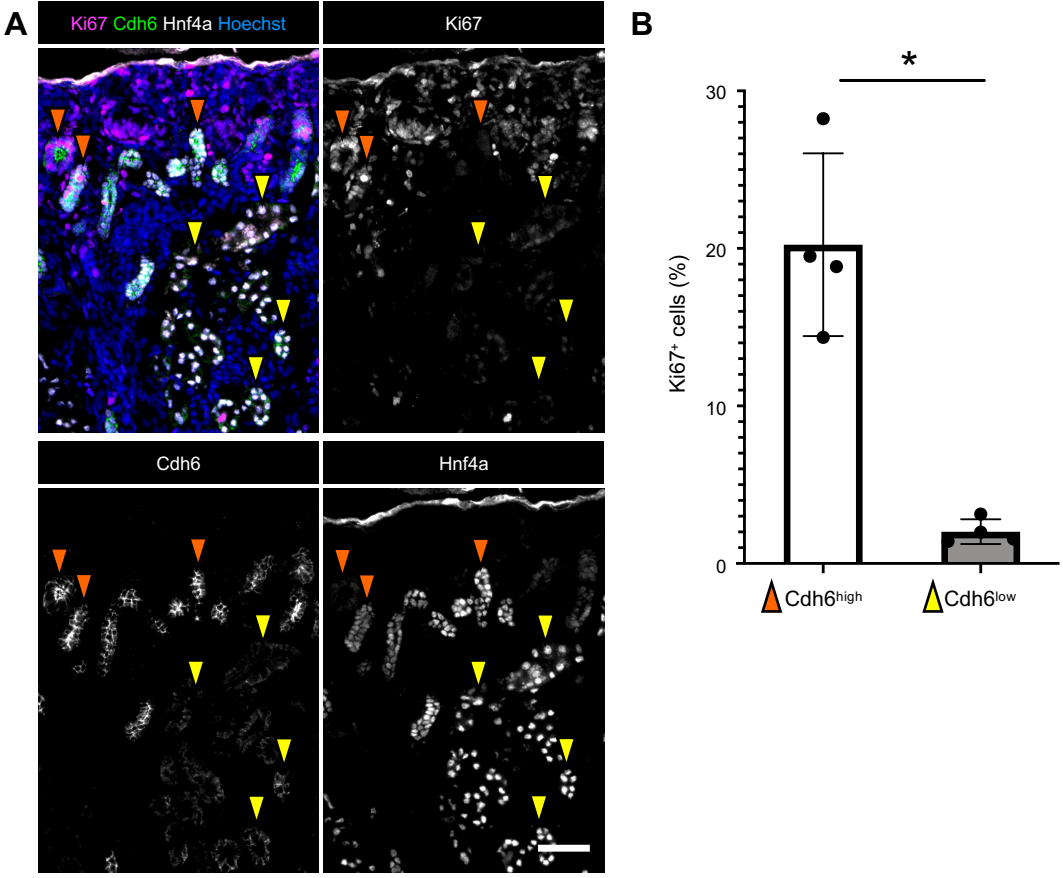

**Figure 6. Genome-wide mapping of Hnf4a binding sites in the newborn mouse kidney** (A) Analysis of known motifs from Hnf4a ChIP-seq. (B) Bar graph showing the percentage of region–gene associations according to genomic regions' distance to TSS computed by Genomic Regions Enrichment of Annotations Tool (GREAT) (<http://bejerano.stanford.edu/great/public/html/>). (C) Pie chart representing the distribution of Hnf4a peaks within the annotated genome. (D) GREAT MGI Expression annotations of Hnf4a peaks showing top six enriched terms. (E) Genome browser view of Hnf4a ChIP-seq peaks near TSS of PT genes.

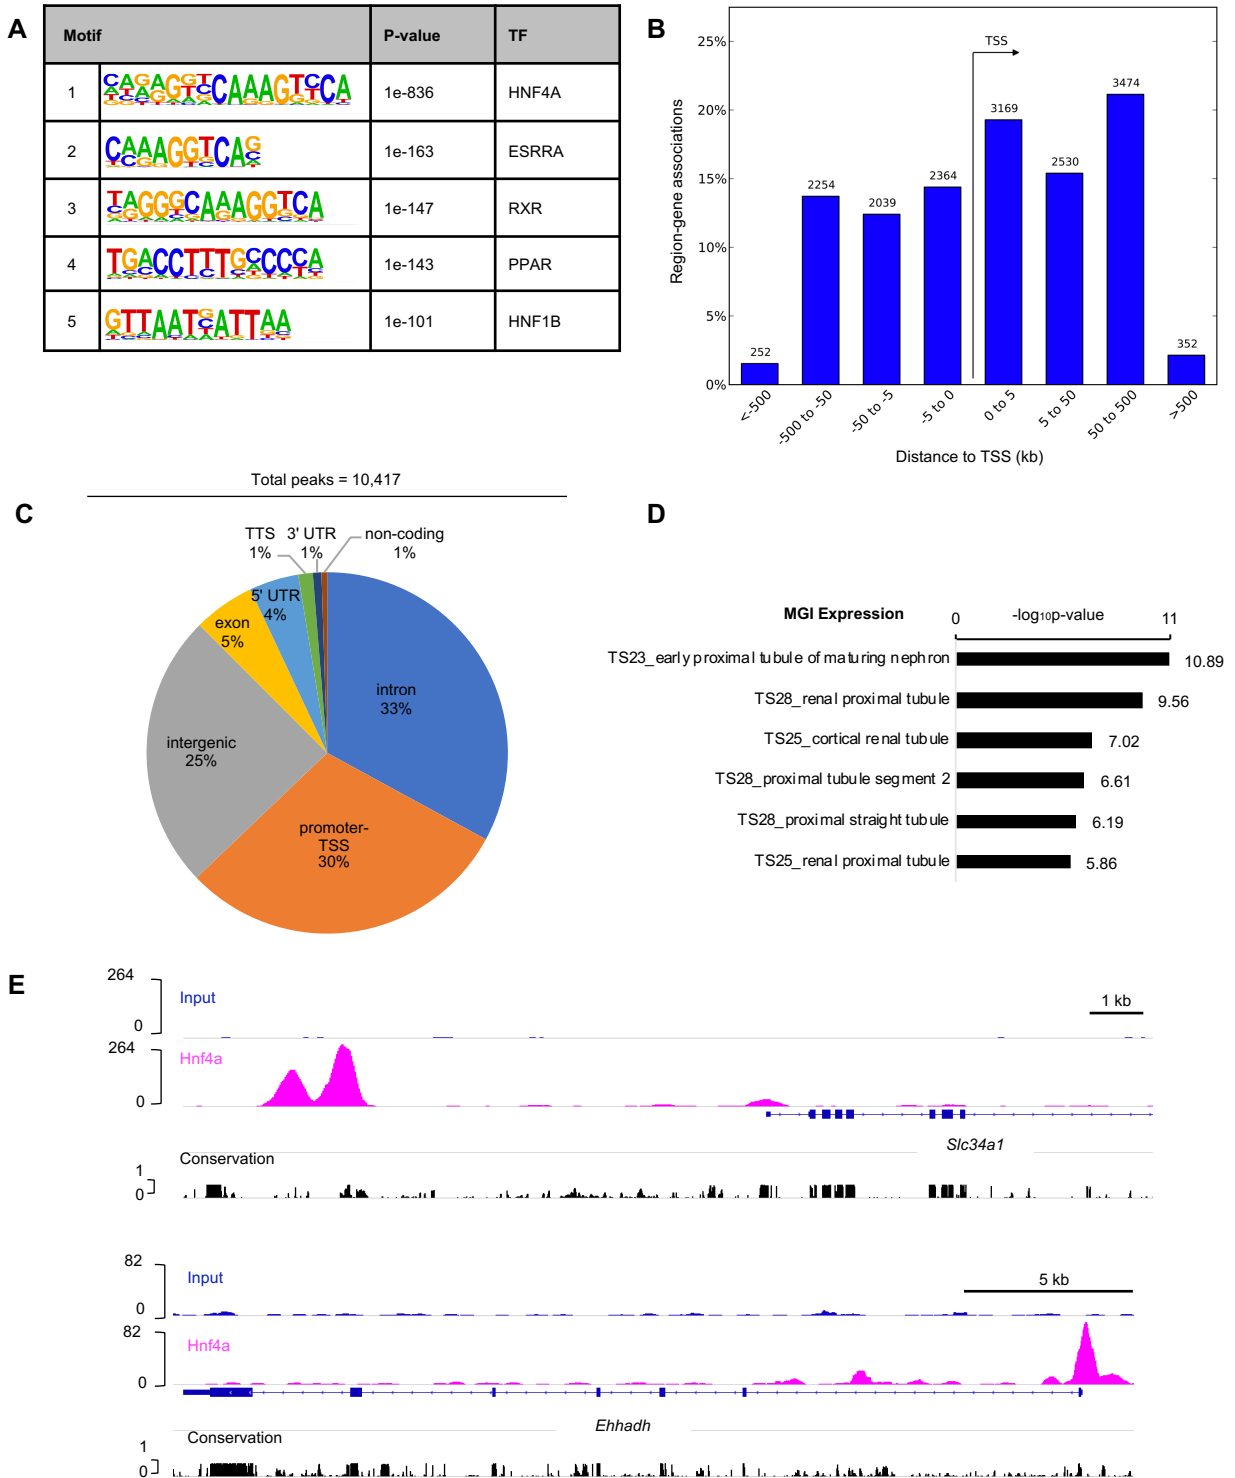



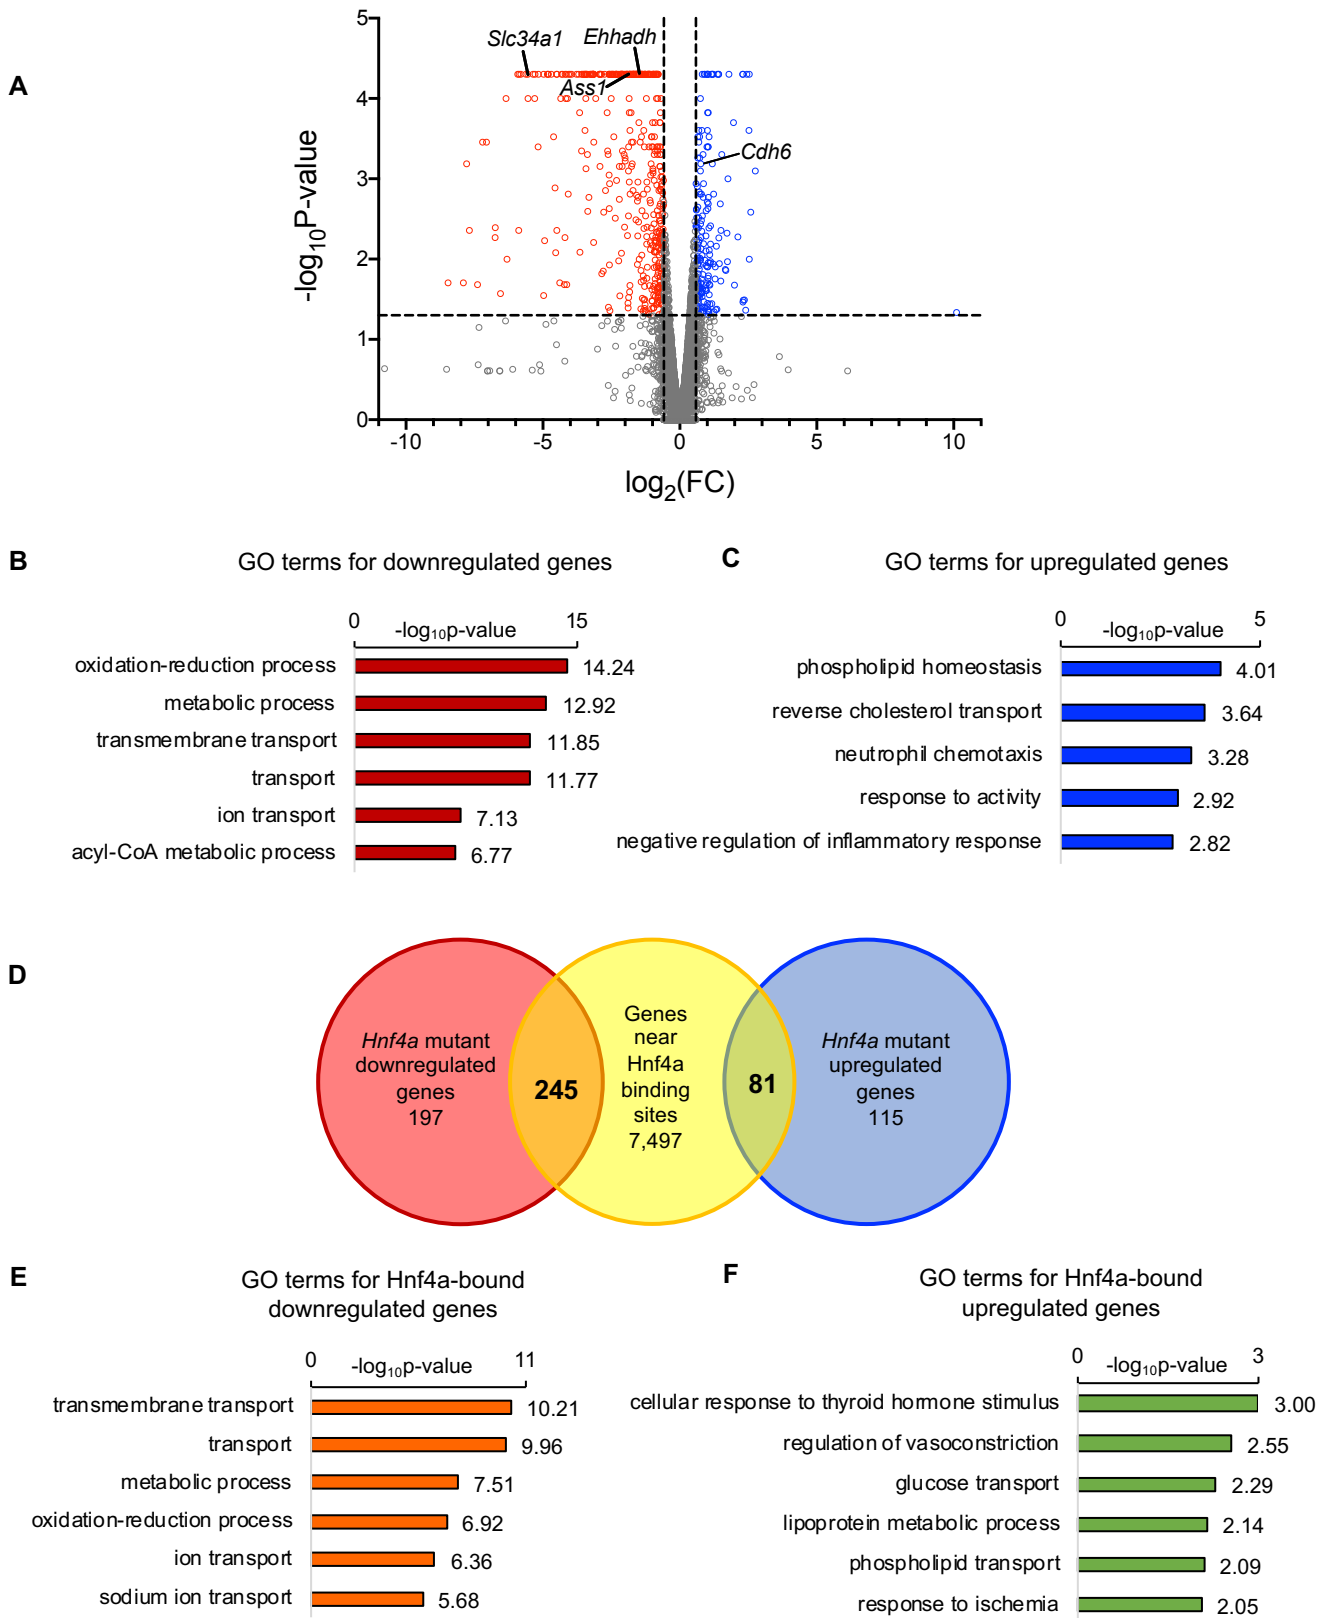

**Figure 7. Intersection of Hnf4a ChIP-seq peaks with differentially expressed genes in the *Hnf4a* mutant kidney identified direct target genes of Hnf4a.** (A) Differential expression analysis in the *Hnf4a* mutant versus the *Hnf4a* control kidney at P0. Red and blue points in the volcano plot mark genes with significantly decreased or increased expression, respectively, in the *Hnf4a* mutant. Vertical dash lines (x-axis) mark  $\log_2(1.5)$ . Horizontal dash line (y-axis) marks  $-\log_{10}(0.05)$  (B) Gene ontology (GO) analysis of significantly downregulated genes in the *Hnf4a* mutant kidney showing top six enriched terms. (C) GO analysis of significantly upregulated genes in the *Hnf4a* mutant kidney showing top six enriched terms. (D) Venn diagram shows the overlap of genes associated with Hnf4a binding sites and differentially expressed genes in the *Hnf4a* mutant kidney. (E) GO analysis of Hnf4a-bound, downregulated genes showing top six enriched terms. (F) GO analysis of Hnf4a-bound, upregulated genes showing top six enriched terms.

**Table 1. Hnf4a target genes that were downregulated in the *Hnf4a* mutant kidney**

**A. Genes associated with transmembrane transport**

| <b>Gene symbol</b> | <b>Gene name</b>                                                       |
|--------------------|------------------------------------------------------------------------|
| <i>Sfxn1</i>       | sideroflexin 1                                                         |
| <i>Slc13a1</i>     | solute carrier family 13 (sodium/sulfate symporters), member 1         |
| <i>Slc16a4</i>     | solute carrier family 16 (monocarboxylic acid transporters), member 4  |
| <i>Slc16a9</i>     | solute carrier family 16 (monocarboxylic acid transporters), member 9  |
| <i>Slc2a2</i>      | solute carrier family 2 (facilitated glucose transporter), member 2    |
| <i>Slc2a5</i>      | solute carrier family 2 (facilitated glucose transporter), member 5    |
| <i>Slc22a6</i>     | solute carrier family 22 (organic anion transporter), member 6         |
| <i>Slc22a8</i>     | solute carrier family 22 (organic anion transporter), member 8         |
| <i>Slc22a12</i>    | solute carrier family 22 (organic anion/cation transporter), member 12 |
| <i>Slc22a1</i>     | solute carrier family 22 (organic cation transporter), member 1        |
| <i>Slc22a13</i>    | solute carrier family 22 (organic cation transporter), member 13       |
| <i>Slc22a2</i>     | solute carrier family 22 (organic cation transporter), member 2        |
| <i>Slc23a1</i>     | solute carrier family 23 (nucleobase transporters), member 1           |
| <i>Slc47a1</i>     | solute carrier family 47, member 1                                     |
| <i>Slc5a8</i>      | solute carrier family 5 (iodide transporter), member 8                 |
| <i>Slc5a1</i>      | solute carrier family 5 (sodium/glucose cotransporter), member 1       |
| <i>Slc5a12</i>     | solute carrier family 5 (sodium/glucose cotransporter), member 12      |

**B. Genes associated with lipid and fatty acid metabolism**

| <b>Gene symbol</b> | <b>Gene name</b>                                                   |
|--------------------|--------------------------------------------------------------------|
| <i>Hmgcs2</i>      | 3-hydroxy-3-methylglutaryl-Coenzyme A synthase 2                   |
| <i>Gm2a</i>        | GM2 ganglioside activator protein                                  |
| <i>Acaa1b</i>      | acetyl-Coenzyme A acyltransferase 1B                               |
| <i>Acsm1</i>       | acyl-CoA synthetase medium-chain family member 1                   |
| <i>Dgat2</i>       | diacylglycerol O-acyltransferase 2                                 |
| <i>Elovl2</i>      | elongation of very long chain fatty acids -like 2                  |
| <i>Ehhadh</i>      | enoyl-Coenzyme A, hydratase/3-hydroxyacyl Coenzyme A dehydrogenase |
| <i>Fads3</i>       | fatty acid desaturase 3                                            |
| <i>Hsd17b2</i>     | hydroxysteroid (17-beta) dehydrogenase 2                           |
| <i>Nceh1</i>       | neutral cholesterol ester hydrolase 1                              |
| <i>Pck1</i>        | phosphoenolpyruvate carboxykinase 1, cytosolic                     |
| <i>Pcx</i>         | pyruvate carboxylase                                               |
| <i>Slc27a2</i>     | solute carrier family 27 (fatty acid transporter), member 2        |
| <i>Amacr</i>       | alpha-methylacyl-CoA racemase                                      |
| <i>Cry11</i>       | crystallin, lambda 1                                               |
